# Supplementary material for: Co-embedded sulfur vacant MoS2 monolayer as a promising catalyst for formaldehyde oxidation: a theoretical evaluation
Source: Royal Society of Chemistry journal article supplement (doi:10.1039/d1nj02869c), 2021-01-01
Supplement: d1nj02869c1.pdf [file d1nj02869c1.pdf]

## Supporting information

### **Co-embedded sulfur vacant MoS<sub>2</sub> monolayer as a promising catalyst for formaldehyde oxidation: a theoretical evaluation**

Thanadol Jitwatanasirikul,<sup>1</sup> Thantip Roongcharoen,<sup>2</sup> Chirawat Chitpakdee,<sup>2</sup> Siriporn Jungsuttiwong,<sup>1,\*</sup> Preeyaporn Poldorn,<sup>1</sup> Kaito Takahashi,<sup>3</sup> Supawadee Namuangruk<sup>2,\*</sup>

<sup>1</sup> *Department of Chemistry, Faculty of Science, Ubon Ratchathani University,  
Warinchamrap, Ubon Ratchathani, 34190, Thailand*

<sup>2</sup> *National Nanotechnology Center, National Science and Technology Development Agency,  
Pathumthani 12120, Thailand*

<sup>3</sup> *Institute of Atomic and Molecular Sciences, Academia Sinica, Taipei 10617*

\*Corresponding Authors: siriporn.j@ubu.ac.th and supawadee@nanotec.or.th

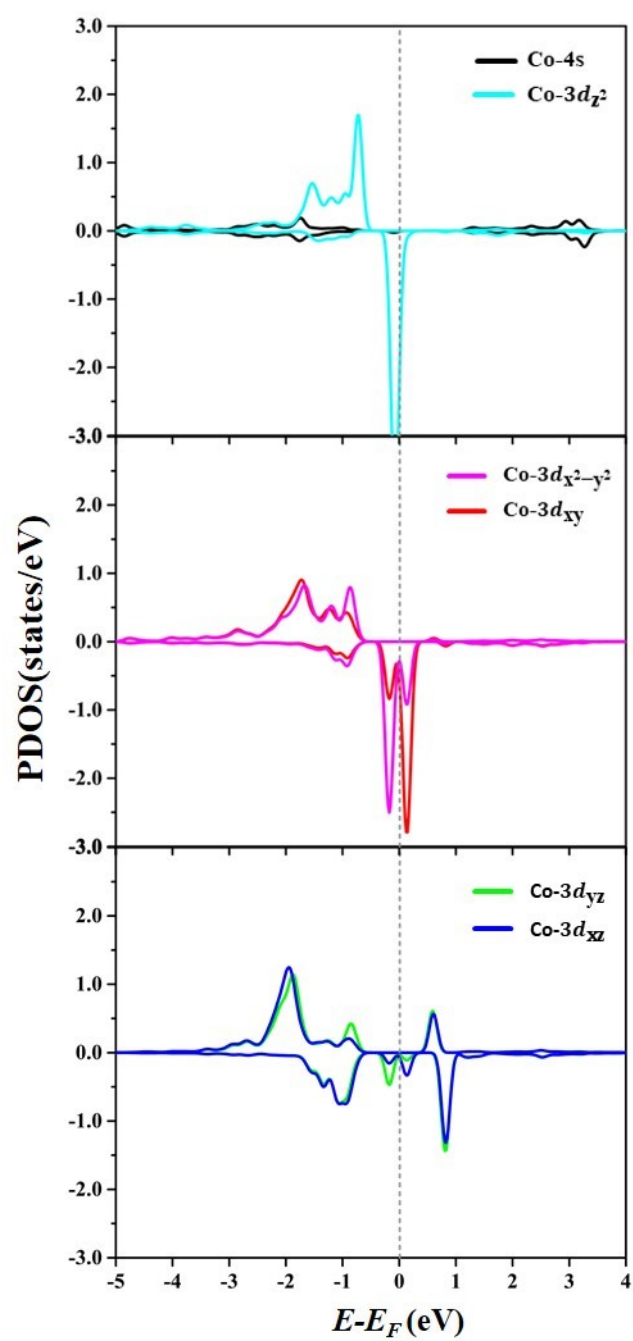

**Figure S1.** Projected density of state for the Co  $4s$ ,  $3d_z^2$ ,  $3d_{x^2-y^2}$ ,  $3d_{xy}$ ,  $3d_{yz}$ ,  $3d_{xz}$  in the  $\text{CoS}_v\text{-MoS}_2$

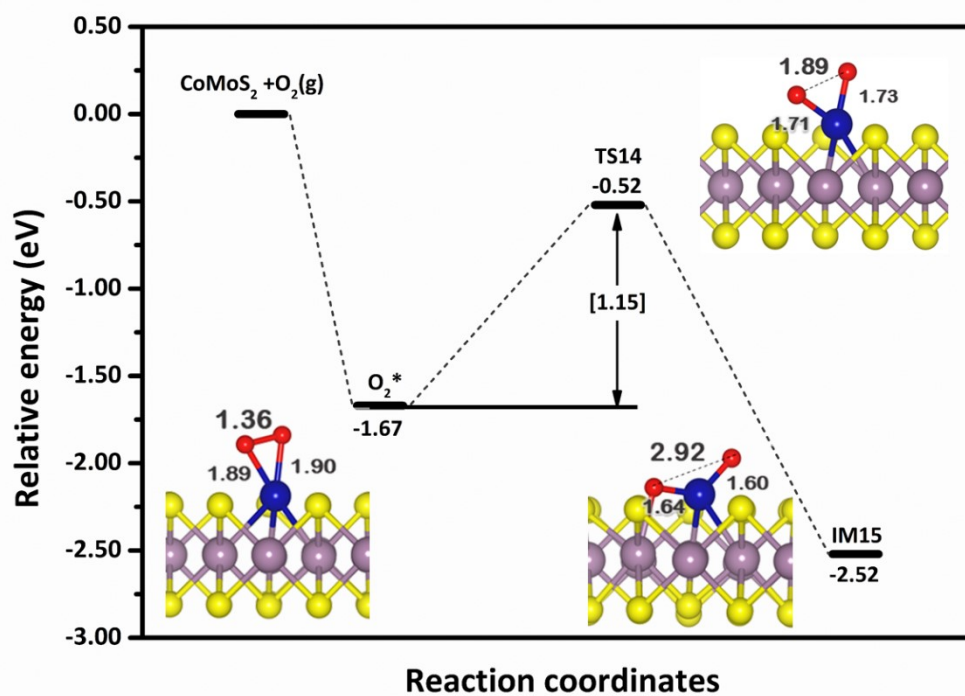

Figure S2. Energy profile and corresponding structures of  $O_2$  dissociation.

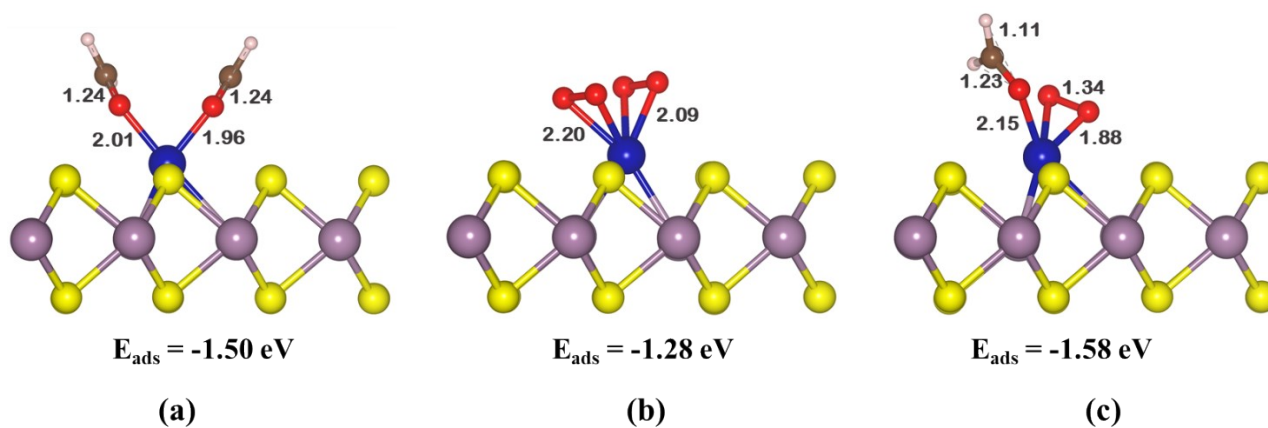

Figure S3. The possible co-adsorption configurations between  $HCHO$  and  $O_2$  on  $Co-MoS_2$

(a) two- $HCHO$  (b) two-  $O_2$  (c) one- $HCHO$  and one-  $O_2$

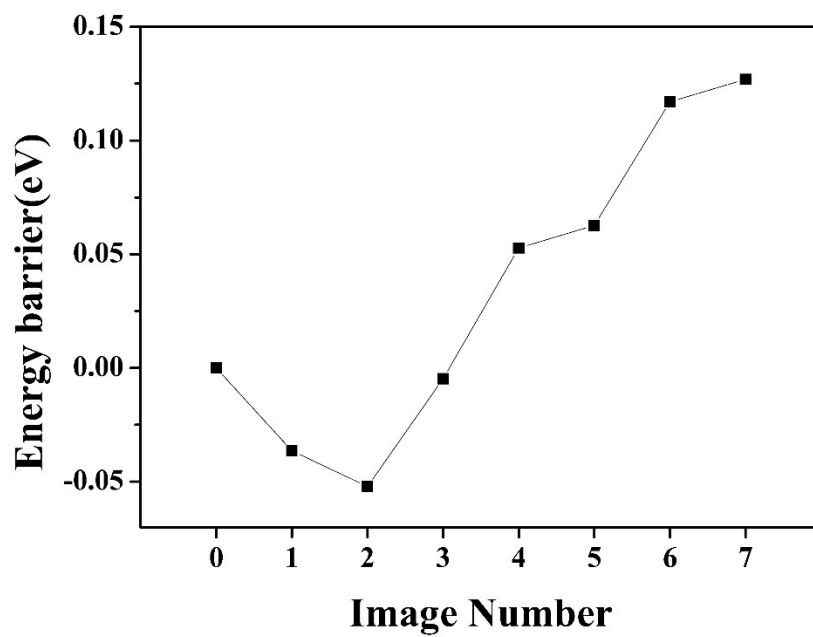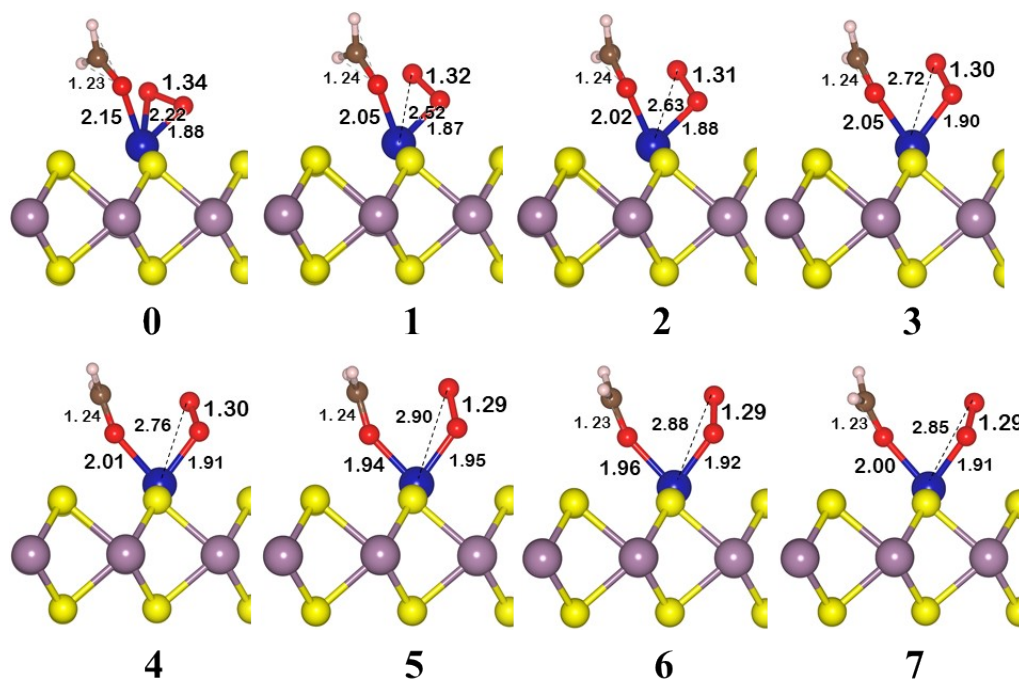

Figure S4. Energy barrier and corresponding structures of IM6 to IM7

**Table S1.** Gibbs free energy barrier ( $\Delta G_b$ , eV) and The reaction rate constants ( $k^{\text{TST}}$ ) for

| Species | $E$      | $E_b$ | $E_{\text{ZPE}}$ | $TS$  | $C_p dT$ | $G$      | $G_b$ | $k^{\text{TST}}$   |
|---------|----------|-------|------------------|-------|----------|----------|-------|--------------------|
| IM9→    | -391.028 |       | 3.511            | 3.314 | 1.861    | -388.970 |       |                    |
| TS9     | -390.716 | 0.312 | 3.477            | 3.231 | 1.823    | -388.646 | 0.32  | $2.04 \times 10^7$ |
| IM12→   | -393.767 |       | 3.490            | 3.380 | 1.885    | -391.773 |       |                    |
| TS11    | -393.466 | 0.301 | 3.483            | 3.316 | 1.864    | -391.436 | 0.34  | $1.26 \times 10^7$ |
| IM13→   | -393.662 |       | 3.448            | 3.398 | 1.887    | -391.724 |       |                    |
| TS12    | -393.248 | 0.414 | 3.458            | 3.391 | 1.877    | -391.304 | 0.42  | $4.97 \times 10^5$ |
| IM14→   | -393.384 |       | 3.443            | 3.348 | 1.879    | -391.410 |       |                    |
| TS13    | -393.004 | 0.380 | 3.352            | 3.318 | 1.871    | -391.100 | 0.31  | $3.46 \times 10^7$ |

elementary steps of the co-adsorption path at 298.15 K.

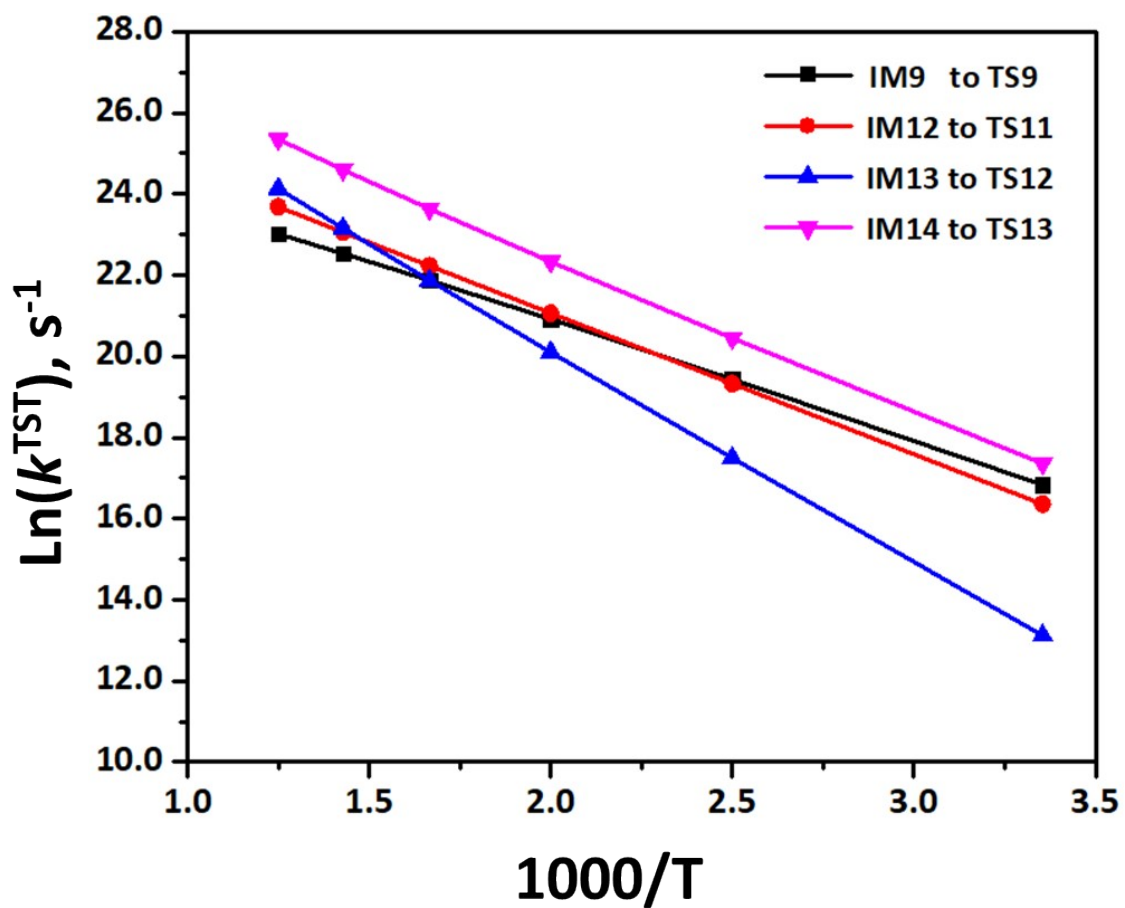

**Figure S5.** The logarithms of reaction rate constants for rate-determining steps of each elementary step at different temperatures (298.15 – 800 K).

**Table S2.** The reaction rate constants ( $k^{\text{TST}}$ ) and Gibbs free energy barrier ( $\Delta G_b$ ) for rate-determining steps of each path at different temperatures.

| Temperature (K) | Consecutive path                    |                                        | Co-adsorption path                     |                                        |
|-----------------|-------------------------------------|----------------------------------------|----------------------------------------|----------------------------------------|
|                 | $k^{\text{TST}}$ (s <sup>-1</sup> ) | $\Delta G_b$ eV(kJ.mol <sup>-1</sup> ) | $k^{\text{Desorp}}$ (s <sup>-1</sup> ) | $\Delta G_b$ eV(kJ.mol <sup>-1</sup> ) |
| 298.15          | 1.12 x 10 <sup>5</sup>              | 0.46 (44.38)                           | 1.99 x 10 <sup>0</sup>                 | 0.74 (71.30)                           |
| 400.00          | 1.03 x 10 <sup>8</sup>              | 0.39 (37.63)                           | 2.08 x 10 <sup>4</sup>                 | 0.68 (65.86)                           |
| 500.00          | 6.34 x 10 <sup>9</sup>              | 0.32 (30.88)                           | 4.07 x 10 <sup>6</sup>                 | 0.64 (61.32)                           |
| 600.00          | 1.06 x 10 <sup>11</sup>             | 0.25 (24.12)                           | 1.24 x 10 <sup>8</sup>                 | 0.60 (57.45)                           |
| 700.00          | 8.28 x 10 <sup>11</sup>             | 0.17 (16.40)                           | 1.32 x 10 <sup>9</sup>                 | 0.46 (54.17)                           |
| 800.00          | 4.00 x 10 <sup>12</sup>             | 0.10 (9.65)                            | 7.91 x 10 <sup>9</sup>                 | 0.53 (50.89)                           |

| System                        | Magnetic moment of Co in the system ( $\mu_B$ ) |
|-------------------------------|-------------------------------------------------|
| $Co_{Sv}-MoS_2$               | 1.3                                             |
| R1. HCHO direct decomposition |                                                 |
| HCHO*                         | 0.2                                             |
| $CH_2^* + O^*$ (IM1)          | 0.9                                             |
| $CHO^* + H^*$ (IM2)           | 0.4                                             |
| $CO^* + 2H^*$ (FS1)           | 0.7                                             |
| $CO^*$ (FS1')                 | 1.2                                             |
| R2. CO oxidation              |                                                 |
| $CO^* + O_2^*$ (IM3)          | 1.6                                             |
| $OCOO^*$ (IM4)                | 1.1                                             |
| $O^*$                         | -0.4                                            |
| $CO_2$ (FS3)                  | 1.3                                             |
| R3. HCHO oxidation by $O_2$   |                                                 |
| $HCHO^* + O_2^*$ (IM6)        | 1.9                                             |
| $HCHO^* + O_2^*$ (IM7)        | 1.8                                             |
| $CHO^* + OOH^*$ (IM8)         | 1.2                                             |
| $OCH_2OO^*$ (IM9)             | 2.0                                             |
| $HCOOH^* + O^*$ (IM10)        | 2.1                                             |
| $\eta^1-OCHO^* + OH^*$ (IM11) | 2.2                                             |
| $\eta^2-OCHO^* + OH^*$ (IM13) | -2.3                                            |
| $\eta^1-OCHO^* + OH^*$ (IM4)  | 2.2                                             |
| $CO_2^* + H_2O^*$ (FS4)       | 1.4                                             |

**Table S3.** Calculated magnetic moments of Cobalt (Co) in the systems.
